# Supplementary material for: A multicellular rosette-mediated collective dendrite extension
Source: eLife. 2019 Feb 15;8:e38065. doi: 10.7554/eLife.38065 (PMC6400498; doi:10.7554/eLife.38065)
Supplement: Figure 1—source data 1. [file elife-38065-fig1-data1.xlsx]

## Sheet: Figure 1F
Figure 1F
		Displacement of dendrite tip (μm)
	Time (min)	0	5	10	15	20	25	30	35	40	45	50
	embryo 1	0	0.48	1.06207	1.57632	2.17071	3.06542	3.59578	4.42267	6.58932	7.66676	7.91808
	embryo 2	0	1.37637	1.87318	2.6	3.86678	5.18968	5.52188	5.30434	6.20722	6.63771	8.70356
	embryo 3	0	1.28	2.7247	3.0568	4.39345	4.96774	6.09262	6.29717	6.88744	7.58947	7.98879
	embryo 4	0	0.64	1.6	3.21621	4.0002	4.34088	5.02935	6.03576	7.34999	8.15412	8.5585
	embryo 5	0	1.13137	1.78885	3.32938	4.32296	4.53114	5.47284	6.67233	7.46373	8.90708	10.0256
