# Supplementary material for: A multicellular rosette-mediated collective dendrite extension
Source: eLife. 2019 Feb 15;8:e38065. doi: 10.7554/eLife.38065 (PMC6400498; doi:10.7554/eLife.38065)
Supplement: Figure 3—source data 1. [file elife-38065-fig3-data1.xlsx]

## Sheet: Sheet1
	dex-1(ns42)	dyf-7(m537)	sax-7(ky146)	hmr-1 RNAi	dlg-1 RNAi	dyf-7(m537); sax-7(ky146)	dyf-7(m537); hmr-1 RNAi	sax-7(ky146); hmr-1 RNAi	dyf-7(m537); dlg-1 RNAi	dyf-7(m537); sax-7(ky146); hmr-1 RNAi	dyf-7(m537); sax-7(ky146); dlg-1 RNAi
compare to wt1	1	0.0463	1	1	1	0.0004	0.5008	1	0.0417	0.0001	0.0001
compare to dyf-7(m537)2	N/A	N/A	N/A	N/A	N/A	0.1166	0.4055	N/A	1	0.0045	0.001
1 adjusted P value threshold for 11 comparisons by Bonferroni Correction is 0.0045. P values less than 0.0045 were highlighted in green.
2 adjusted P value threshold for 5 comparisons by Bonferroni Correction is 0.01. P values less than 0.0045 were highlighted in green.
