# Supplementary material for: A multicellular rosette-mediated collective dendrite extension
Source: eLife. 2019 Feb 15;8:e38065. doi: 10.7554/eLife.38065 (PMC6400498; doi:10.7554/eLife.38065)
Supplement: Figure 4—source data 1. [file elife-38065-fig4-data1.xlsx]

## Sheet: Figure 4C
Figure 4
	DYF-7::GFP size (μm)
	wt	par-6(M/Z)
	1.64224	2.78112
	1.32576	2.49568
	1.224	1.99008
	1.59712	2.36368
	1.67872	1.73328
	1.31312
	1.18064
	1.66128
	0.94
	1.34016
	1.1704
	1.32064
	1.36496
	1.24
	1.76144
	0.98112
	1.016
	1.30592
	1.00016
	1.40016
	1.5752
	1.73696
	1.77552
	1.25776
	1.28576
	1.53936
	1.11936
	1.33888
